# Supplementary material for: The Anti-Cancer Activity of Lycopene: A Systematic Review of Human and Animal Studies
Source: MDPI journal article supplement (doi:10.3390/nu14235152), 2022-12-03
Supplement: s1 [file s1]

## Supplement 1. Search terms

### Pubmed

```
(((((lycopene[Title]) AND (cancer[Title]))) NOT ('Meta-analysis'[Publication Type] OR review[Publication Type] OR 'systematic review'[Publication Type]) ) NOT ('Meta-analysis'[Title] OR Review'[Title] OR 'Systematic review'[Title])) Filters: Full text, Humans
```

and for animal research

```
(((((lycopene[Title]) AND (cancer[Title]))) NOT ('Meta-analysis'[Publication Type] OR review[Publication Type] OR 'systematic review'[Publication Type]) ) NOT ('Meta-analysis'[Title] OR Review'[Title] OR 'Systematic review'[Title])) Filters: Other Animals
```

### Scopus

```
TITLE(lycopene AND cancer) AND ( LIMIT-TO ( DOCTYPE,"ar" ) OR LIMIT-TO ( DOCTYPE,"cp" ) ) AND ( LIMIT-TO ( LANGUAGE,"English" ) )
```

### Web of science

```
cancer AND lycopene (Title) and Article OR Data Paper (Document Type) not Database Review OR Editorial Material OR Review (Document Type) and English (Language)
```
