# Supplementary material for: The Anti-Cancer Activity of Lycopene: A Systematic Review of Human and Animal Studies
Source: MDPI journal article supplement (doi:10.3390/nu14235152), 2022-12-03
Supplement: s1 [file s1]

### Supplement 3. Overview of human studies on the role of lycopene in cancer treatment

| Reference in paper | Cancer          | Year | Country | Study design | Population size (with controls) | Lycopene supplementation                                        | Endpoint                                                                                         | Outcome  | Finding                                                                                                                                                                                                                                                    |
|--------------------|-----------------|------|---------|--------------|---------------------------------|-----------------------------------------------------------------|--------------------------------------------------------------------------------------------------|----------|------------------------------------------------------------------------------------------------------------------------------------------------------------------------------------------------------------------------------------------------------------|
| [19]               | Prostate cancer | 2007 | USA     | Intervention | 71                              | 15 mg twice daily +/- 40 mg soy isoflavone mixture              | Prostate-specific antigen (PSA) response                                                         | Positive | Lycopene and soy isoflavones have activities in prostate cancer patients with PSA relapse disease and may delay the progression of both hormone-refractory and hormone-sensitive prostate cancer.                                                          |
| [30]               | Prostate cancer | 2016 | USA     | Observation  | 14541                           | X                                                               | Prostate cancer-specific mortality                                                               | Positive | Among men with a high risk for cancers (T3-T4 or Gleason score 8–10, or nodal involvement), lycopene intake above median was associated with lower prostate cancer-specific mortality compared to intake below median.                                     |
| [33]               | Prostate cancer | 2021 | USA     | Intervention | 13                              | 30 mg once daily + docetaxel 75 mg/m <sup>2</sup> every 21 days | PSA response, median time to PSA progression, duration of response and overall survival          | Positive | A PSA response rate of 76.9% and median survival of 35.1 months compare favourably to the 45% PSA response rate and 17.4 months median survival reported for the 237 TAX trialists.                                                                        |
| [51]               | Prostate cancer | 2003 | India   | Intervention | 54                              | 2 mg twice daily + orchidectomy                                 | PSA response, response in bones and improvement in peak flow rate                                | Positive | Adding lycopene to orchidectomy produced a more reliable and consistent decrease in serum PSA level, primary and secondary tumour shrinkage, better bone pain relief, lower urinary tract symptoms and improved survival compared with orchidectomy alone. |
| [50]               | Prostate cancer | 2004 | India   | Intervention | 20                              | 10 mg once daily                                                | PSA response, bone pain relief and ECOG (Eastern Cooperative Oncology Group) performance status  | Positive | Lycopene supplementation reduced PSA, improved the ECOG performance status and bone pain relief and alleviated the lower urinary track symptoms.                                                                                                           |
| [49]               | Prostate cancer | 2002 | USA     | Intervention | 26                              | 30 mg once daily                                                | PSA response, tumour stage and extent of high-grade prostatic intra-epithelial neoplasia (HGPIN) | Positive | The intervention group had lower PSA, smaller tumours, less involvement of surgical margins and/or extra-prostatic tissues with cancer and less diffuse involvement of the prostate by HGPIN compared with the subjects in the control group.              |
| [52]               | Prostate cancer | 2009 | Germany | Intervention | 18                              | 15 mg once daily                                                | PSA response, clinical progression, quality of life, pain relief                                 | Negative | No clinically relevant benefits (analgesic use and quality of life) were shown for patients with progressive hormone-refractory prostate cancer.                                                                                                           |
| [48]               | Prostate cancer | 2007 | USA     | Intervention | 46                              | 15 mg twice daily                                               | PSA response, tumour response, toxicity                                                          | Negative | Lycopene did not appear effective for treating androgen-independent prostate cancer.                                                                                                                                                                       |

|      |                 |      |     |              |    |                                          |                                                               |          |                                                                                                                                                                                                                                                                                           |
|------|-----------------|------|-----|--------------|----|------------------------------------------|---------------------------------------------------------------|----------|-------------------------------------------------------------------------------------------------------------------------------------------------------------------------------------------------------------------------------------------------------------------------------------------|
| [45] | Prostate cancer | 2006 | USA | Intervention | 36 | 15, 30, 45, 60, 90 and 120 mg once daily | PSA response, pharmacokinetics, toxicity                      | Negative | Lycopene supplementation in men with biochemically relapsed prostate cancer did not result in any discernible response in serum PSA.                                                                                                                                                      |
| [25] | Prostate cancer | 2002 | USA | Intervention | 26 | 15 mg twice daily                        | PSA response, tumour stage, Gleason score and extent of HGPIN | Positive | Lycopene intervention resulted in smaller tumours, organ-confined disease without involvement of surgical margins or extra-prostatic tissues and focal involvement of the prostate with HGPIN. The mean plasma PSA levels were lower in the intervention group than in the control group. |

## References:

- [19] Tang, Y.; Parmakhtiar, B.; Simoneau, A.R.; Xie, J.; Fruehauf, J.; Lilly, M.; Zi, X. Lycopene enhances docetaxel's effect in castration-resistant prostate cancer associated with insulin-like growth factor I receptor levels. *Neoplasia* **2011**, *13*, 108–119. <https://doi.org/10.1593/neo.101092>.
- [25] Kristal, A.R.; Till, C.; Platz, E.A.; Song, X.; King, I.B.; Neuhausser, M.L.; Ambrosone, C.B.; Thompson, I.M. Serum lycopene concentration and prostate cancer risk: Results from the Prostate Cancer Prevention Trial. *Cancer Epidemiol. Biomark. Prev.* **2011**, *20*, 638–646. <https://doi.org/10.1158/1055-9965.EPI-10-1221>.
- [30] Morgia, G.; Voce, S.; Palmieri, F.; Gentile, M.; Iapicca, G.; Giannantoni, A.; Blefari, F.; Carini, M.; Vespasiani, G.; Santelli, G.; et al. Association between selenium and lycopene supplementation and incidence of prostate cancer: Results from the post-hoc analysis of the procomb trial. *Phytomedicine* **2017**, *34*, 1–5. <https://doi.org/10.1016/j.phymed.2017.06.008>.
- [33] Vogt, T.M.; Mayne, S.T.; Graubard, B.I.; Swanson, C.A.; Sowell, A.L.; Schoenberg, J.B.; Swanson, G.M.; Greenberg, R.S.; Hoover, R.N.; Hayes, R.B.; et al. Serum lycopene, other serum carotenoids, and risk of prostate cancer in US Blacks and Whites. *Am. J. Epidemiol.* **2002**, *155*, 1023–1032. <https://doi.org/10.1093/aje/155.11.1023>.
- 45] Rowles, J.L.; Smith, J.W.; Applegate, C.C.; Miller, R.J.; Wallig, M.A.; Kaur, A.; Sarol, J.N.; Musaad, S.; Clinton, S.K.; O'Brien, W.D.; et al. Dietary Tomato or Lycopene Do Not Reduce Castration-Resistant Prostate Cancer Progression in a Murine Model. *J. Nutr.* **2020**, *150*, 1808–1817. <https://doi.org/10.1093/jn/nxaa107>.
- [48] Magbanua, M.J.M.; Roy, R.; Sosa, E.V.; Weinberg, V.; Federman, S.; Mattie, M.D.; Hughes-Fulford, M.; Simko, J.; Shinohara, K.; Haqq, C.M.; et al. Gene expression and biological pathways in tissue of men with prostate cancer in a randomized clinical trial of lycopene and fish oil supplementation. *PLoS ONE* **2011**, *6*, e24004. <https://doi.org/10.1371/journal.pone.0024004>.
- [49] van Breemen, R.B.; Sharifi, R.; Viana, M.; Pajkovic, N.; Zhu, D.; Yuan, L.; Yang, Y.; Bowen, P.E.; Stacewicz-Sapuntzakis, M. Antioxidant effects of lycopene in African American men with prostate cancer or benign prostate hyperplasia: A randomized, controlled trial. *Cancer Prev. Res.* **2011**, *4*, 711–718. <https://doi.org/10.1158/1940-6207.CAPR-10-0288>.
- [50] Clark, P.E.; Hall, M.C.; Borden, L.S.J.; Miller, A.A.; Hu, J.J.; Lee, W.R.; Stindt, D.; D'Agostino, R.J.; Lovato, J.; Harmon, M.; et al. Phase I-II prospective dose-escalating trial of lycopene in patients with biochemical relapse of prostate cancer after definitive local therapy. *Urology* **2006**, *67*, 1257–1261. <https://doi.org/10.1016/j.urology.2005.12.035>.
- [51] Rao, A.V.; Fleshner, N.; Agarwal, S. Serum and tissue lycopene and biomarkers of oxidation in prostate cancer patients: A case-control study. *Nutr. Cancer* **1999**, *33*, 159–164. <https://doi.org/10.1207/S15327914NC330207>.
- [52] Giovannucci, E.; Rimm, E.B.; Liu, Y.; Stampfer, M.J.; Willett, W.C. A prospective study of tomato products, lycopene, and prostate cancer risk. *J. Natl. Cancer Inst.* **2002**, *94*, 391–398. <https://doi.org/10.1093/jnci/94.5.391>.
