# Supplementary material for: The Anti-Cancer Activity of Lycopene: A Systematic Review of Human and Animal Studies
Source: MDPI journal article supplement (doi:10.3390/nu14235152), 2022-12-03
Supplement: s1 [file s1]

## Supplement 2. Overview of human studies on the role of lycopene in cancer prevention

| Reference | Cancer                                       | Year | Country   | Study design | Population size | Endpoint                                                                                                                                                                                 | Outcome      | Finding                                                                                                                                                                                                                                                                                                                                                  |
|-----------|----------------------------------------------|------|-----------|--------------|-----------------|------------------------------------------------------------------------------------------------------------------------------------------------------------------------------------------|--------------|----------------------------------------------------------------------------------------------------------------------------------------------------------------------------------------------------------------------------------------------------------------------------------------------------------------------------------------------------------|
| [84]      | Any cancer                                   | 2020 | USA       | Observation  | 22,835          | Cancer mortality                                                                                                                                                                         | Positive     | The beneficial effect of lycopene was confirmed regardless of age or body mass.                                                                                                                                                                                                                                                                          |
| [92]      | Bladder cancer                               | 1989 | USA       | Observation  | 25,802          | Retrospective incidence of bladder cancer in 12-year follow-up                                                                                                                           | Positive     | The lycopene level was lower among the cases with cancers at a borderline level of significance.                                                                                                                                                                                                                                                         |
| [59]      | Breast cancer                                | 2005 | USA       | Observation  | 1,076           | Incidence of breast cancer in women without prevalent cancer in 9.9-year follow-up                                                                                                       | Negative     | Neither higher dietary nor plasma lycopene levels were associated with a reduced risk of breast cancer.                                                                                                                                                                                                                                                  |
| [70]      | Cervical cancer                              | 1996 | USA       | Observation  | 235             | Retrospective incidence of cervical cancer                                                                                                                                               | Positive     | The mean plasma levels of carotenoids (beta-carotene, lycopene and canthaxanthin) and alpha-tocopherol were significantly lower in women with cervical intra-epithelial neoplasia and cervical cancer.                                                                                                                                                   |
| [74]      | Colorectal cancer                            | 2006 | Australia | Observation  | 1,442           | Retrospective incidence of colorectal cancer                                                                                                                                             | Negative     | Lycopene was not associated with colorectal cancer risk.                                                                                                                                                                                                                                                                                                 |
| [8'9]     | Different cancers, including prostate cancer | 2009 | Finland   | Observation  | 997             | Incidence of any cancer in men in 12.6-year follow-up                                                                                                                                    | Inconclusive | The higher circulating concentrations of lycopene may contribute to the lower risk of cancer, with the exception of prostate cancer.                                                                                                                                                                                                                     |
| [82]      | Gastric cancer                               | 2022 | Vietnam   | Observation  | 226             | Retrospective incidence of stomach cancer                                                                                                                                                | Positive     | Both trans-lycopene and $\beta$ -cryptoxanthin intake showed a strong protective effect against stomach cancer regardless of <i>H. pylori</i> status.                                                                                                                                                                                                    |
| [66]      | Head and neck cancer                         | 2020 | USA       | Observation  | 23              | Features of head and neck cancer survivors: DNA methylation profiles in leukocytes; physiological, clinical and lifestyle parameters related to inflammation (including lycopene levels) | Positive     | The group of head and neck cancer survivors with high circulating lycopene levels also had significant differential methylation of transcriptional and translational regulators and genes in the T-cell receptor signalling pathway, including hypermethylation of the CD40 ligand (CD40LG) and Tec protein tyrosine kinase and hypomethylation of CD8A. |

|      |                                               |      |        |                                                              |        |                                                                                                                                |          |                                                                                                                                                                                                                                                         |
|------|-----------------------------------------------|------|--------|--------------------------------------------------------------|--------|--------------------------------------------------------------------------------------------------------------------------------|----------|---------------------------------------------------------------------------------------------------------------------------------------------------------------------------------------------------------------------------------------------------------|
| [95] | Lung cancer                                   | 2009 | USA    | Observation                                                  | 77,126 | Retrospective incidence of lung cancer                                                                                         | Negative | Lycopene supplement use was not associated with lung cancer risk. The use of individual lycopene supplements was associated with a 71% reduced risk for men but a 74% higher risk for women, but these associations were not statistically significant. |
| [87] | Melanoma, basal cell and squamous cell cancer | 1995 | USA    | Observation                                                  | 297    | Retrospective incidence of skin cancer                                                                                         | Negative | There were no significant associations between serum micronutrient levels and the risk of subsequent skin cancer.                                                                                                                                       |
| [64] | Oral cavity, pharynx or larynx                | 2004 | USA    | Observation                                                  | 259    | Cancer mortality                                                                                                               | Positive | Lycopene was inversely associated with mortality in oral cavity, pharynx or larynx cancer.                                                                                                                                                              |
| [78] | Pancreatic cancer                             | 2005 | Canada | Observation                                                  | 5,183  | Retrospective incidence of prostate cancer                                                                                     | Positive | Lycopene, provided mainly by tomatoes, was associated with a 31% reduction in pancreatic cancer risk among men.                                                                                                                                         |
| [23] | Prostate cancer                               | 2017 | Italy  | Intervention: lycopene–selenium supplementation              | 209    | Incidence of prostate cancer in patients with lower urinary tract symptoms or benign prostatic hyperplasia in 2-year follow-up | Negative | Selenium and lycopene supplementation does not influence prostate cancer incidence.                                                                                                                                                                     |
| [21] | Prostate cancer                               | 2020 | USA    | Observation                                                  | 27,934 | Incidence of prostate cancer in men without prevalent cancer in 7.9-year follow-up                                             | Positive | Consumption of canned and cooked tomatoes may reduce the risk of prostate cancer.                                                                                                                                                                       |
| [55] | Prostate cancer                               | 2019 | UK     | Intervention: lycopene or lycopene-rich diet supplementation | 72,729 | 159 serum metabolite measures and retrospective incidence of prostate cancer                                                   | Positive | Lycopene lowered the levels of pyruvate, which the Mendelian randomisation analysis suggests may be causally related to reduced prostate cancer risk.                                                                                                   |
| [17] | Prostate cancer                               | 2011 | USA    | Observation                                                  | 3,434  | Incidence of prostate cancer in men without prevalent cancer in 7-year follow-up                                               | Negative | Lycopene intake does not affect prostate cancer risk.                                                                                                                                                                                                   |
| [44] | Prostate cancer                               | 2016 | USA    | Observation                                                  | 46,719 | Incidence of prostate cancer in men without prevalent cancer in 23-year follow-up                                              | Positive | Tomato sauce consumption may play a role in reducing prostate cancers that harbour TMPRSS2:ERG.                                                                                                                                                         |

|      |                 |      |           |                                                                                                        |        |                                                                                                                             |          |                                                                                                                                                                                    |
|------|-----------------|------|-----------|--------------------------------------------------------------------------------------------------------|--------|-----------------------------------------------------------------------------------------------------------------------------|----------|------------------------------------------------------------------------------------------------------------------------------------------------------------------------------------|
| [12] | Prostate cancer | 2021 | USA       | Observation                                                                                            | 637    | Retrospective incidence of prostate cancer defined as total prostate-specific antigen (PSA) level and the ratio of free PSA | Positive | Sufficient lycopene intake from daily food could serve as a protector against prostate cancer, but such an association was observed only in non-Hispanic white men.                |
| [11] | Prostate cancer | 2005 | China     | Observation                                                                                            | 404    | Retrospective incidence of prostate cancer                                                                                  | Positive | The prostate cancer risk declined with increasing consumptions of lycopene, $\alpha$ -carotene, $\beta$ -carotene, $\beta$ -cryptoxanthin, lutein and zeaxanthin.                  |
| [24] | Prostate cancer | 2014 | USA       | Observation                                                                                            | 49,898 | Retrospective incidence of prostate cancer                                                                                  | Positive | Dietary intake of lycopene was associated with reduced risk of lethal prostate cancer and with a lesser degree of angiogenesis in the tumour.                                      |
| [10] | Prostate cancer | 2007 | China     | Observation                                                                                            | 404    | Retrospective incidence of prostate cancer                                                                                  | Positive | Intake of green tea and lycopene reduced the risk of prostate cancer in Chinese men. The two substances have a stronger preventive effect together than separately.                |
| [53] | Prostate cancer | 2006 | USA       | Observation                                                                                            | 29,361 | Incidence of prostate cancer in men without prevalent cancer in 4.2-year follow-up                                          | Negative | Greater lycopene or tomato product consumption does not protect from prostate cancer.                                                                                              |
| [26] | Prostate cancer | 2002 | USA       | Observation                                                                                            | 437    | Retrospective incidence of prostate cancer                                                                                  | Positive | Lycopene was inversely associated with prostate cancer risk, particularly for aggressive disease. Serum lycopene concentrations were significantly lower in blacks than in whites. |
| [46] | Prostate cancer | 1999 | Canada    | Observation                                                                                            | 24     | Retrospective incidence of prostate cancer                                                                                  | Positive | Serum protein thiol levels, which reflect DNA repair capacity, were significantly lower among the cancer patients with lower lycopene levels.                                      |
| [41] | Prostate cancer | 2010 | Australia | Intervention: dietary advice and vitamin A supplementation (either synthetic beta-carotene or retinol) | 321    | Incidence of prostate cancer in 14-year follow-up                                                                           | Negative | The serum concentrations of folate, lycopene, $\beta$ -carotene and vitamins A and E had no associations with subsequent development of prostate cancer.                           |
| [47] | Prostate cancer | 2002 | USA       | Observation                                                                                            | 47,365 | Retrospective incidence of prostate cancer                                                                                  | Positive | Frequent consumption of tomato products was associated with a lower risk of prostate cancer.                                                                                       |
| [18] | Prostate cancer | 2007 | USA       | Observation                                                                                            | 692    | Retrospective incidence of prostate cancer                                                                                  | Negative | Lycopene and other carotenoids were unrelated to prostate cancer.                                                                                                                  |

|      |                                                                              |      |         |                                                     |       |                                                                                                                                                  |              |                                                                                                                                                                        |
|------|------------------------------------------------------------------------------|------|---------|-----------------------------------------------------|-------|--------------------------------------------------------------------------------------------------------------------------------------------------|--------------|------------------------------------------------------------------------------------------------------------------------------------------------------------------------|
| [37] | Prostate cancer                                                              | 2001 | USA     | Observation                                         | 197   | Retrospective incidence of prostate cancer                                                                                                       | Positive     | The study confirmed the inverse associations between lycopene, other carotenoids (e.g. zeaxanthin, lutein and beta-cryptoxanthin) and prostate cancer.                 |
| [20] | Prostate cancer                                                              | 1999 | USA     | Observation                                         | 1,872 | Incidence of prostate cancer in healthy men in 13-year follow-up                                                                                 | Positive     | The results confirmed the inverse association of lycopene and prostate cancer, particularly for aggressive cancer and for men not consuming beta-carotene supplements. |
| [40] | Prostate cancer                                                              | 2014 | Italy   | Intervention: 20–25 mg/day of lycopene for 6 months | 32    | Progression of high-grade prostatic intra-epithelial neoplasia to prostate cancer in 6-month follow-up                                           | Negative     | The study showed no overall benefits from lycopene supplementation.                                                                                                    |
| [31] | Prostate cancer                                                              | 2007 | USA     | Intervention: 30 mg/day of lycopene for 4 months    | 81    | Serum PSA and lycopene                                                                                                                           | Negative     | The lycopene-induced PSA lowering was transient.                                                                                                                       |
| [38] | Prostate cancer                                                              | 2006 | USA     | Observation                                         | 251   | Retrospective incidence of prostate cancer depending on the XRCC1 genotype, lycopene intake and plasma alpha-tocopherol and beta-carotene levels | Inconclusive | The association between lycopene and prostate cancer is complex and may be modified by other antioxidants and by the XRCC1 genotype (DNA repair genes).                |
| [67] | Upper aerodigestive tract (oral cavity, pharynx, larynx, oesophageal cancer) | 2000 | Uruguay | Observation                                         | 729   | Retrospective incidence of upper aerodigestive tract cancers                                                                                     | Positive     | The food group composed of raw tomato and tomato-rich foods and lycopene itself showed a strong inverse association with upper aerodigestive tract cancers.            |

#### Reference:

- [10] Jian, L.; Lee, A.H.; Binns, C.W. Tea and lycopene protect against prostate cancer. *Asia Pac. J. Clin. Nutr.* **2007**, *16* (Suppl. 1), 453–457.
- [11] Jian, L.; Du, C.-J.; Lee, A.H.; Binns, C.W. Do dietary lycopene and other carotenoids protect against prostate cancer? *Int. J. Cancer* **2005**, *113*, 1010–1014. <https://doi.org/10.1002/ijc.20667>.
- [12] Tang, L.; Jin, T.; Zeng, X.; Wang, J.-S. Lycopene inhibits the growth of human androgen-independent prostate cancer cells in vitro and in BALB/c nude mice. *J. Nutr.* **2005**, *135*, 287–290. <https://doi.org/10.1093/jn/135.2.287>.
- [17] Canene-Adams, K.; Lindshield, B.L.; Wang, S.; Jeffery, E.H.; Clinton, S.K.; Erdman, J.W.J. Combinations of tomato and broccoli enhance antitumor activity in dunning r3327-h prostate adenocarcinomas. *Cancer Res.* **2007**, *67*, 836–843. <https://doi.org/10.1158/0008-5472.CAN-06-3462>.

- [18] Beynon, R.A.; Richmond, R.C.; Santos Ferreira, D.L.; Ness, A.R.; May, M.; Smith, G.D.; Vincent, E.E.; Adams, C.; Ala-Korpela, M.; Würtz, P.; et al. Investigating the effects of lycopene and green tea on the metabolome of men at risk of prostate cancer: The ProDiet randomised controlled trial. *Int. J. Cancer* **2019**, *144*, 1918–1928. <https://doi.org/10.1002/ijc.31929>.
- [20] Lu, Y.; Edwards, A.; Chen, Z.; Tseng, T.-S.; Li, M.; Gonzalez, G.V.; Zhang, K. Insufficient Lycopene Intake Is Associated With High Risk of Prostate Cancer: A Cross-Sectional Study From the National Health and Nutrition Examination Survey (2003–2010). *Front. Public Heal.* **2021**, *9*, 792572. <https://doi.org/10.3389/fpubh.2021.792572>.
- [21] Moran, N.E.; Thomas-Ahner, J.M.; Fleming, J.L.; McElroy, J.P.; Mehl, R.; Grainger, E.M.; Riedl, K.M.; Toland, A.E.; Schwartz, S.J.; Clinton, S.K. Single Nucleotide Polymorphisms in  $\beta$ -Carotene Oxygenase 1 are Associated with Plasma Lycopene Responses to a Tomato-Soy Juice Intervention in Men with Prostate Cancer. *J. Nutr.* **2019**, *149*, 381–397. <https://doi.org/10.1093/jn/nxy304>.
- [23] Konijeti, R.; Henning, S.; Moro, A.; Sheikh, A.; Elashoff, D.; Shapiro, A.; Ku, M.; Said, J.W.; Heber, D.; Cohen, P.; et al. Chemoprevention of prostate cancer with lycopene in the TRAMP model. *Prostate* **2010**, *70*, 1547–1554. <https://doi.org/10.1002/pros.21190>.
- [24] Conlon, L.E.; Wallig, M.A.; Erdman, J.W.J. Low-lycopene containing tomato powder diet does not protect against prostate cancer in TRAMP mice. *Nutr. Res.* **2015**, *35*, 882–890. <https://doi.org/10.1016/j.nutres.2015.07.003>.
- [26] Peters, U.; Leitzmann, M.F.; Chatterjee, N.; Wang, Y.; Albanes, D.; Gelmann, E.P.; Friesen, M.D.; Riboli, E.; Hayes, R.B. Serum lycopene, other carotenoids, and prostate cancer risk: A nested case-control study in the prostate, lung, colorectal, and ovarian cancer screening trial. *Cancer Epidemiol. Biomark. Prev.* **2007**, *16*, 962–968. <https://doi.org/10.1158/1055-9965.EPI-06-0861>.
- [31] Zu, K.; Mucci, L.; Rosner, B.A.; Clinton, S.K.; Loda, M.; Stampfer, M.J.; Giovannucci, E. Dietary lycopene, angiogenesis, and prostate cancer: A prospective study in the prostate-specific antigen era. *J. Natl. Cancer Inst.* **2014**, *106*, djt430. <https://doi.org/10.1093/jnci/djt430>.
- [37] Wang, Y.; Jacobs, E.J.; Newton, C.C.; McCullough, M.L. Lycopene, tomato products and prostate cancer-specific mortality among men diagnosed with nonmetastatic prostate cancer in the Cancer Prevention Study II Nutrition Cohort. *Int. J. Cancer* **2016**, *138*, 2846–2855. <https://doi.org/10.1002/ijc.30027>.
- [38] Bunker, C.H.; McDonald, A.C.; Evans, R.W.; de la Rosa, N.; Boumosleh, J.M.; Patrick, A.L. A randomized trial of lycopene supplementation in Tobago men with high prostate cancer risk. *Nutr. Cancer* **2007**, *57*, 130–137. <https://doi.org/10.1080/01635580701274046>.
- [40] Venkateswaran, V.; Fleshner, N.E.; Sugar, L.M.; Klotz, L.H. Antioxidants block prostate cancer in lady transgenic mice. *Cancer Res.* **2004**, *64*, 5891–5896. <https://doi.org/10.1158/0008-5472.CAN-04-0690>.
- [41] Imaida, K.; Tamano, S.; Kato, K.; Ikeda, Y.; Asamoto, M.; Takahashi, S.; Nir, Z.; Murakoshi, M.; Nishino, H.; Shirai, T. Lack of chemopreventive effects of lycopene and curcumin on experimental rat prostate carcinogenesis. *Carcinogenesis* **2001**, *22*, 467–472. <https://doi.org/10.1093/carcin/22.3.467>.
- [44] Goodman, M.; Bostick, R.M.; Ward, K.C.; Terry, P.D.; van Gils, C.H.; Taylor, J.A.; Mandel, J.S. Lycopene intake and prostate cancer risk: Effect modification by plasma antioxidants and the XRCC1 genotype. *Nutr. Cancer* **2006**, *55*, 13–20. [https://doi.org/10.1207/s15327914nc5501\\_2](https://doi.org/10.1207/s15327914nc5501_2).
- [46] Mariani, S.; Lionetto, L.; Cavallari, M.; Tubaro, A.; Rasio, D.; De Nunzio, C.; Hong, G.M.; Borro, M.; Simmaco, M. Low prostate concentration of lycopene is associated with development of prostate cancer in patients with high-grade prostatic intraepithelial neoplasia. *Int. J. Mol. Sci.* **2014**, *15*, 1433–1440. <https://doi.org/10.3390/ijms15011433>.
- [47] Beilby, J.; Ambrosini, G.L.; Rossi, E.; de Klerk, N.H.; Musk, A.W. Serum levels of folate, lycopene,  $\beta$ -carotene, retinol and vitamin E and prostate cancer risk. *Eur. J. Clin. Nutr.* **2010**, *64*, 1235–1238. <https://doi.org/10.1038/ejcn.2010.124>.
- [53] Jatoi, A.; Burch, P.; Hillman, D.; Vanyo, J.M.; Dakhil, S.; Nikcevic, D.; Rowland, K.; Morton, R.; Flynn, P.J.; Young, C.; et al. A Tomato-Based, Lycopene-Containing Intervention for Androgen-Independent Prostate Cancer: Results of a Phase II Study from The North Central Cancer Treatment Group. *Urology* **2007**, *69*, 289–294. <https://doi.org/10.1016/j.urology.2006.10.019>.
- [55] Ansari, M.S.; Gupta, N.P. Lycopene: A novel drug therapy in hormone refractory metastatic prostate cancer. *Urol. Oncol.* **2004**, *22*, 415–420. <https://doi.org/10.1016/j.urolonc.2004.05.009>.
- [59] Sesso, H.D.; Buring, J.E.; Zhang, S.M.; Norkus, E.P.; Gaziano, J.M. Dietary and plasma lycopene and the risk of breast cancer. *Cancer Epidemiol. Biomark. Prev.* **2005**, *14*, 1074–1081. <https://doi.org/10.1158/1055-9965.EPI-04-0683>.

- [64] Mayne, S.T.; Cartmel, B.; Lin, H.; Zheng, T.; Goodwin, W.J.J. Low plasma lycopene concentration is associated with increased mortality in a cohort of patients with prior oral, pharynx or larynx cancers. *J. Am. Coll. Nutr.* **2004**, *23*, 34–42. <https://doi.org/10.1080/07315724.2004.10719340>.
- [66] Moody, L.; Crowder, S.L.; Fruge, A.D.; Locher, J.L.; Demark-Wahnefried, W.; Rogers, L.Q.; Delk-Licata, A.; Carroll, W.R.; Spencer, S.A.; Black, M.; et al. Epigenetic stratification of head and neck cancer survivors reveals differences in lycopene levels, alcohol consumption, and methylation of immune regulatory genes. *Clin. Epigenetics* **2020**, *12*, 138. <https://doi.org/10.1186/s13148-020-00930-5>.
- [67] De Stefani, E.; Oreggia, F.; Boffetta, P.; Deneo-Pellegrini, H.; Ronco, A.; Mendilaharsu, M. Tomatoes, tomato-rich foods, lycopene and cancer of the upper aerodigestive tract: A case-control in Uruguay. *Oral Oncol.* **2000**, *36*, 47–53. [https://doi.org/10.1016/s1368-8375\(99\)00050-0](https://doi.org/10.1016/s1368-8375(99)00050-0).
- [70] Palan, P.R.; Mikhail, M.S.; Goldberg, G.L.; Basu, J.; Runowicz, C.D.; Romney, S.L. Plasma levels of beta-carotene, lycopene, canthaxanthin, retinol, and alpha- and tau-tocopherol in cervical intraepithelial neoplasia and cancer. *Clin. Cancer Res.* **1996**, *2*, 181–185.
- [74] Kune, G.; Watson, L. Colorectal cancer protective effects and the dietary micronutrients folate, methionine, vitamins B6, B12, C, E, selenium, and lycopene. *Nutr. Cancer* **2006**, *56*, 11–21. [https://doi.org/10.1207/s15327914nc5601\\_3](https://doi.org/10.1207/s15327914nc5601_3).
- [78] Nkondjock, A.; Ghadirian, P.; Johnson, K.C.; Krewski, D. Dietary intake of lycopene is associated with reduced pancreatic cancer risk. *J. Nutr.* **2005**, *135*, 592–597. <https://doi.org/10.1093/jn/135.3.592>.
- [82] Sengngam, K.; Hoc, T.H.; Hang, D.V.; Tran Ngoan, L. Trans-Lycopene and  $\beta$ -Cryptoxanthin Intake and Stomach Cancer in Vietnamese Men: A Pilot Case-Control Study. *Asian Pac. J. Cancer Prev.* **2022**, *23*, 861–865. <https://doi.org/10.31557/APJCP.2022.23.3.861>
- [84] Mazidi, M.; Ferns, G.A.; Banach, M. A high consumption of tomato and lycopene is associated with a lower risk of cancer mortality: Results from a multi-ethnic cohort. *Public Health Nutr.* **2020**, *23*, 1569–1575. <https://doi.org/10.1017/S1368980019003227>.
- [87] Breslow, R.A.; Alberg, A.J.; Helzlsouer, K.J.; Bush, T.L.; Norkus, E.P.; Morris, J.S.; Spate, V.E.; Comstock, G.W. Serological precursors of cancer: Malignant melanoma, basal and squamous cell skin cancer, and prediagnostic levels of retinol, beta- carotene, lycopene, alpha-tocopherol, and selenium. *Cancer Epidemiol. Biomark. Prev.* **1995**, *4*, 837–842.
- [89] Karppi, J.; Kurl, S.; Nurmi, T.; Rissanen, T.H.; Pukkala, E.; Nyyssönen, K. Serum lycopene and the risk of cancer: The Kuopio Ischaemic Heart Disease Risk Factor (KIHD) study. *Ann. Epidemiol.* **2009**, *19*, 512–518. <https://doi.org/10.1016/j.annepidem.2009.03.017>.
- [92] Helzlsouer, K.J.; Comstock, G.W.; Morris, J.S. Selenium, lycopene, alpha-tocopherol, beta-carotene, retinol, and subsequent bladder cancer. *Cancer Res.* **1989**, *49*, 6144–6148.
- [95] Satia, J.A.; Littman, A.; Slatore, C.G.; Galanko, J.A.; White, E. Long-term use of beta-carotene, retinol, lycopene, and lutein supplements and lung cancer risk: Results from the VITamins And Lifestyle (VITAL) study. *Am. J. Epidemiol.* **2009**, *169*, 815–828. <https://doi.org/10.1093/aje/kwn409>.
-
