# Supplementary material for: The Anti-Cancer Activity of Lycopene: A Systematic Review of Human and Animal Studies
Source: MDPI journal article supplement (doi:10.3390/nu14235152), 2022-12-03
Supplement: s1 [file s1]

#### Supplement 4. Overview of the analysed animal-based studies

| Reference in paper | Cancer                      | Year | Animal  | Intervention                                                                              | Endpoint                                                                                                                                                       | Outcome  | Finding                                                                                                                                                                                                                                                                                                                                                 |
|--------------------|-----------------------------|------|---------|-------------------------------------------------------------------------------------------|----------------------------------------------------------------------------------------------------------------------------------------------------------------|----------|---------------------------------------------------------------------------------------------------------------------------------------------------------------------------------------------------------------------------------------------------------------------------------------------------------------------------------------------------------|
| [68]               | Breast cancer               | 2011 | Rats    | Carcinogen to induce cancer + lycopene +/- genistein supplementation for 20 weeks         | Cancer incidence, tumour mass and volume                                                                                                                       | Positive | 70% reduction of mammary cancer incidence by lycopene and 40% by genistein + lycopene; 48% and 67% reduction of tumour weight, respectively; and 18% and 65% mean tumour volumes, respectively                                                                                                                                                          |
| [69]               | Colon cancer                | 2012 | Mice    | Lycopene–fish oil supplementation                                                         | Tumour growth and progression                                                                                                                                  | Positive | Lycopene and fish oil synergistically inhibited the growth of colon cancer in tumour-bearing mice. Underlying mechanism of prevention: ↑ expression of p21(cip1/waf1) and p27(kip1) (cell cycle inhibitors); inhibition of cell division: ↓ of PCNA, β-catenin, cyclin D1 and C-myc proteins; inhibition of progression: ↓ MMP-7, MMP-9, COX-2 and PGE2 |
| [63]               | Colon cancer                | 2011 | Mice    | Lycopene supplementation for 5 weeks                                                      | Growth and progression of colorectal cancer                                                                                                                    | Positive | Lycopene could act as a chemopreventive agent against the growth and progression of colorectal cancer.                                                                                                                                                                                                                                                  |
| [81]               | Oesophageal cancer          | 2020 | Rats    | Normal diets containing different concentrations of lycopene for 25 weeks                 | Incidence of cancer and antioxidant activity                                                                                                                   | Positive | The incidence of tumours in the rats treated with lycopene was significantly lower than in the controls. The study confirmed the possible anti-inflammatory and pro-apoptotic mechanisms.                                                                                                                                                               |
| [73]               | Gastric cancer              | 2013 | Rats    | Carcinogen to induce cancer + lycopene supplementation (at increasing doses) for 26 weeks | Expression of oxidative stress markers                                                                                                                         | Positive | Lycopene may play an important role in protecting against oxidative stress and gastric carcinogenesis by enhancing antioxidant enzyme activities and immunity activities.                                                                                                                                                                               |
| [83]               | Gastric cancer              | 2011 | Rats    | Carcinogen to induce cancer + lycopene supplementation at different doses for 21 weeks    | Expression of oxidative injury and immunity activities                                                                                                         | Positive | Lycopene upregulated the redox status and immunity activities and finally decreased the risk of gastric cancer.                                                                                                                                                                                                                                         |
| [93]               | Gastric cancer              | 2005 | Rats    | Lycopene +/- S-allylcysteine +/- carcinogen                                               | Incidence of gastric cancer, redox status markers                                                                                                              | Positive | S-allylcysteine and lycopene significantly suppressed the development of gastric cancer, but the supplements given in combination were more effective.                                                                                                                                                                                                  |
| [71]               | Gastric cancer              | 2002 | Rats    | Lycopene +/- carcinogen                                                                   | Incidence of gastric cancer, redox status markers                                                                                                              | Positive | Lycopene may exert inhibitory effects by modulating the oxidant and antioxidant status in the gastric mucosa.                                                                                                                                                                                                                                           |
| [72]               | Gastric cancer              | 2006 | Ferrets | Lycopene at low and high doses +/- carcinogen                                             | Changes in protein levels of cell proliferation and apoptosis markers                                                                                          | Positive | Lycopene may prevent smoke exposure-induced cell proliferation and apoptosis in the gastric mucosa.                                                                                                                                                                                                                                                     |
| [60]               | Hepatocellular cancer (HCC) | 2001 | Rats    | Lycopene supplementation for 70 weeks                                                     | Volume of HCC; concentration of copper, iron and zinc; expression of GST-P (a marker for preneoplastic or neoplastic lesions in chemical hepatocarcinogenesis) | Negative | Long-term administration of lycopene did not reduce the risk of hepatocarcinogenesis.                                                                                                                                                                                                                                                                   |

|      |                                |      |         |                                                                                                                               |                                                                                                    |          |                                                                                                                                                                                                                             |
|------|--------------------------------|------|---------|-------------------------------------------------------------------------------------------------------------------------------|----------------------------------------------------------------------------------------------------|----------|-----------------------------------------------------------------------------------------------------------------------------------------------------------------------------------------------------------------------------|
| [88] | HCC                            | 2015 | Mice    | Lycopene supplementation for 12 weeks +/- carcinogen                                                                          | Incidence of HCC; levels of hypoxia, angiogenesis and metastatic markers                           | Positive | Lycopene supplementation may counteract HCC progression and/or protect against disease onset.                                                                                                                               |
| [62] | HCC                            | 2008 | Mice    | Lycopene supplementation at low and high doses for 12 weeks                                                                   | Incidence of metastases                                                                            | Positive | Lycopene supplementation reduces tumour metastasis and suggests that such an action is associated with attenuation of tumour invasion, proliferation and angiogenesis.                                                      |
| [57] | Lung and hepatocellular cancer | 2016 | Ferrets | Carcinogen to induce cancer + lycopene supplementation (two doses) for 26 weeks                                               | Incidence of cancers and mortality                                                                 | Positive | Lycopene could provide potential benefits against smoke carcinogen-induced pulmonary and hepatic cancers.                                                                                                                   |
| [85] | Lung cancer                    | 2000 | Mice    | Carcinogen to induce cancer +/- lycopene supplementation (at two doses) for 21 weeks                                          | Incidence of lung cancer                                                                           | Positive | Lycopene may have potential as a chemopreventive agent against carcinogenesis in the male lung.                                                                                                                             |
| [79] | Lung cancer                    | 2019 | Mice    | Anti-mouse PD-1 antibodies 3 days apart for 4 times, and daily lycopene                                                       | Influence of lycopene on the effect of anti-PD-1 treatment on lung cancer                          | Positive | Lycopene could be used as a potential adjuvant drug to synergistically improve the efficiency of anti-PD-1 therapy.                                                                                                         |
| [80] | Lung cancer                    | 2006 | Mice    | Lycopene–D-arginine supplementation                                                                                           | Incidence of lung cancer                                                                           | Positive | Post-treatment with lycopene and D-arginine prevented lung cancer in animals.                                                                                                                                               |
| [91] | Lung cancer                    | 2003 | Ferrets | Lycopene supplementation at low and high doses for 9 weeks                                                                    | Incidence of lung cancer, levels of proliferation and apoptosis markers                            | Positive | IGFBP-3 upregulation and BAD phosphorylation downregulation, which promote apoptosis and inhibit cell proliferation, may mediate the protective effects of lycopene against smoke-induced lung carcinogenesis in ferrets.   |
| [94] | Ovarian cancer                 | 2018 | Hens    | Lycopene supplementation (at two doses) for 12 months                                                                         | Incidence of ovarian cancer, levels of oxidative stress markers and molecular mode of action       | Positive | Lycopene has potential in the chemoprevention of ovarian cancer through antioxidant and anti-inflammatory mechanisms.                                                                                                       |
| [39] | Prostate cancer                | 2020 | Mice    | (1) Lycopene-rich diet from the beginning or starting after castration<br>(2) Lycopene supplementation +/- lycopene-rich diet | Incidence and growth of castration-resistant prostate cancer                                       | Negative | Tomato components had no significant impact on the emergence of castrate-resistant prostate cancer.                                                                                                                         |
| [15] | Prostate cancer                | 2010 | Mice    | Lycopene-rich diet or lycopene supplementation for 20 weeks                                                                   | Incidence of prostate cancer, levels of IGF-I and IGF-binding protein-3, mean oxidative DNA damage | Positive | Lycopene supplementation (in contrast to lycopene-rich diet, such as tomato paste) plays a chemopreventive role in prostate cancer through oxidative DNA damage reduction.                                                  |
| [36] | Prostate cancer                | 2004 | Rats    | Lycopene–vitamin E supplementation for 4 weeks                                                                                | Tumour volume, lycopene serum levels and molecular mode of action                                  | Positive | Lycopene and vitamin E contribute to prostate cancer risk reduction by interfering with internal autocrine or paracrine loops of sex steroid hormone and growth factor activation/synthesis and signalling in the prostate. |
| [16] | Prostate cancer                | 2015 | Mice    | Low lycopene-containing tomato powder diet                                                                                    | Incidence of prostate cancer                                                                       | Negative | A low-lycopene tomato powder intervention failed to reduce carcinogenesis.                                                                                                                                                  |

|      |                   |      |      |                                                             |                                                                                                                          |              |                                                                                                                                                                                                 |
|------|-------------------|------|------|-------------------------------------------------------------|--------------------------------------------------------------------------------------------------------------------------|--------------|-------------------------------------------------------------------------------------------------------------------------------------------------------------------------------------------------|
| [28] | Prostate cancer   | 2006 | Mice | Lycopene +/- vitamin E supplementation daily                | Tumour growth and prostate-specific antigen levels                                                                       | Inconclusive | Lycopene alone did not reduce the tumour volume, but combined with vitamin E, it reduced the growth of prostate tumours by 73% and increased the median survival time by 40%.                   |
| [22] | Prostate cancer   | 2005 | Mice | Lycopene supplementation (at two doses) for 8 weeks         | Tumour growth                                                                                                            | Positive     | Lycopene may inhibit the growth specifically of androgen-independent prostate cancers.                                                                                                          |
| [56] | Prostate cancer   | 2011 | Mice | Lycopene +/- docetaxel (at two doses)                       | Cell proliferation and apoptosis                                                                                         | Positive     | Docetaxel + lycopene supplement resulted in increases in apoptotic cells approximately 98% and 392% more than those resulting from docetaxel and lycopene supplements alone, respectively.      |
| [14] | Prostate cancer   | 2003 | Rats | Lycopene-rich diet or lycopene supplementation + carcinogen | Prostate cancer-specific mortality, prostate cancer-free survival                                                        | Positive     | Consumption of tomato powder but not lycopene inhibited prostate carcinogenesis, suggesting that tomato products contain compounds in addition to lycopene that modify prostate carcinogenesis. |
| [54] | Prostate cancer   | 2007 | Rats | Lycopene-rich diet or lycopene supplementation              | Lycopene-rich diet or lycopene supplementation                                                                           | Positive     | Lycopene in low and high doses insignificantly reduced the tumour weights by 7% and 18%, respectively, whereas tomato reduced the tumour weight by 34% ( $p < 0.05$ ).                          |
| [35] | Prostate cancer   | 2001 | Rats | Incidence of prostate cancer                                | Lycopene or curcumin and carcinogen                                                                                      | Negative     | Neither lycopene nor curcumin can consistently prevent rat prostate carcinogenesis.                                                                                                             |
| [27] | Prostate cancer   | 2011 | Mice | Cancer growth                                               | Low or high dose of lycopene (4 and 16 mg/kg) and a single dose of $\beta$ -carotene (16 mg/kg) twice a week for 7 weeks | Positive     | Both lycopene and $\beta$ -carotene strongly inhibited tumour growth.                                                                                                                           |
| [34] | Prostate cancer   | 2004 | Mice | Incidence of prostate cancer                                | Vitamin E, selenium and lycopene                                                                                         | Positive     | Treatment of animals with the antioxidants resulted in a fourfold reduction in the incidence of prostate cancer compared with the untreated animals.                                            |
| [58] | Renal cell cancer | 2015 | Rats | Lycopene supplementation (at two doses) for 18 months       | Incidence of renal cell cancer                                                                                           | Positive     | Dietary supplementation with lycopene attenuates the development of renal cell cancers.                                                                                                         |
| [86] | skin cancers      | 2018 | Mice | Lycopene supplementation for 5 days                         | Type B ultraviolet (UVB) radiation-induced carcinogenesis and modulation of mTORC2/AKT/FOXO3a signalling pathway         | Positive     | The mTORC2/AKT/FOXO3A axis plays a critical role in the anti-proliferative and pro-apoptotic effects of lycopene in UVB-induced photocarcinogenesis.                                            |

## References

- [14] Graff, R.E.; Pettersson, A.; Lis, R.T.; Ahearn, T.U.; Markt, S.C.; Wilson, K.M.; Rider, J.R.; Fiorentino, M.; Finn, S.; Kenfield, S.A.; et al. Dietary lycopene intake and risk of prostate cancer defined by ERG protein expression. *Am. J. Clin. Nutr.* **2016**, *103*, 851–860. <https://doi.org/10.3945/ajcn.115.118703>.
- [15] Schwenke, C.; Ubrig, B.; Thürmann, P.; Eggersmann, C.; Roth, S. Lycopene for advanced hormone refractory prostate cancer: A prospective, open phase II pilot study. *J. Urol.* **2009**, *181*, 1098–1103. <https://doi.org/10.1016/j.juro.2008.11.012>.

- [16] Kirsh, V.A.; Mayne, S.T.; Peters, U.; Chatterjee, N.; Leitzmann, M.F.; Dixon, L.B.; Urban, D.A.; Crawford, E.D.; Hayes, R.B. A prospective study of lycopene and tomato product intake and risk of prostate cancer. *Cancer Epidemiol. Biomark. Prev.* **2006**, *15*, 92–98. <https://doi.org/10.1158/1055-9965.EPI-05-0563>.
- [22] Boileau, T.W.-M.; Liao, Z.; Kim, S.; Lemeshow, S.; Erdman, J.W.J.; Clinton, S.K. Prostate carcinogenesis in N-methyl-N-nitrosourea (NMU)-testosterone-treated rats fed tomato powder, lycopene, or energy-restricted diets. *J. Natl. Cancer Inst.* **2003**, *95*, 1578–1586. <https://doi.org/10.1093/jnci/djg081>.
- [27] Vaishampayan, U.; Hussain, M.; Banerjee, M.; Seren, S.; Sarkar, F.H.; Fontana, J.; Forman, J.D.; Cher, M.L.; Powell, I.; Pontes, J.E.; et al. Lycopene and soy isoflavones in the treatment of prostate cancer. *Nutr. Cancer* **2007**, *59*, 1–7. <https://doi.org/10.1080/01635580701413934>.
- [28] Gann, P.H.; Ma, J.; Giovannucci, E.; Willett, W.; Sacks, F.M.; Hennekens, C.H.; Stampfer, M.J. Lower prostate cancer risk in men with elevated plasma lycopene levels: Results of a prospective analysis. *Cancer Res.* **1999**, *59*, 1225–1230.
- [34] Yang, C.-M.; Yen, Y.-T.; Huang, C.-S.; Hu, M.-L. Growth inhibitory efficacy of lycopene and  $\beta$ -carotene against androgen-independent prostate tumor cells xenografted in nude mice. *Mol. Nutr. Food Res.* **2011**, *55*, 606–612. <https://doi.org/10.1002/mnfr.201000308>.
- [35] Limpens, J.; Schröder, F.H.; de Ridder, C.M.A.; Bolder, C.A.; Wildhagen, M.F.; Obermüller-Jevic, U.C.; Krämer, K.; van Weerden, W.M. Combined lycopene and vitamin E treatment suppresses the growth of PC-346C human prostate cancer cells in nude mice. *J. Nutr.* **2006**, *136*, 1287–1293. <https://doi.org/10.1093/jn/136.5.1287>.
- [36] Bowen, P.; Chen, L.; Stacewicz-Sapuntzakis, M.; Duncan, C.; Sharifi, R.; Ghosh, L.; Kim, H.-S.; Christov-Tzelkov, K.; van Breemen, R. Tomato sauce supplementation and prostate cancer: Lycopene accumulation and modulation of biomarkers of carcinogenesis. *Exp. Biol. Med.* **2002**, *227*, 886–893. <https://doi.org/10.1177/153537020222701008>.
- [39] Chan, J.M.; Weinberg, V.; Magbanua, M.J.; Sosa, E.; Simko, J.; Shinohara, K.; Federman, S.; Mattie, M.; Hughes-Fulford, M.; Haqq, C.; et al. Nutritional supplements, COX-2 and IGF-1 expression in men on active surveillance for prostate cancer. *Cancer Causes Control* **2011**, *22*, 141–150. <https://doi.org/10.1007/s10552-010-9684-5>.
- [54] Kucuk, O.; Sarkar, F.H.; Djuric, Z.; Sakr, W.; Pollak, M.N.; Khachik, F.; Banerjee, M.; Bertram, J.S.; Wood, D.P. Effects of lycopene supplementation in patients with localized prostate cancer. *Exp. Biol. Med.* **2002**, *227*, 881–885. <https://doi.org/10.1177/153537020222701007>.
- [56] Ansari, M.S.; Gupta, N.P. A comparison of lycopene and orchidectomy vs orchidectomy alone in the management of advanced prostate cancer. *BJU Int.* **2003**, *92*, 375–378; discussion 378. <https://doi.org/10.1046/j.1464-410x.2003.04370.x>.
- [57] Aizawa, K.; Liu, C.; Tang, S.; Veeramachaneni, S.; Hu, K.-Q.; Smith, D.E.; Wang, X.-D. Tobacco carcinogen induces both lung cancer and non-alcoholic steatohepatitis and hepatocellular carcinomas in ferrets which can be attenuated by lycopene supplementation. *Int. J. Cancer* **2016**, *139*, 1171–1181. <https://doi.org/10.1002/ijc.30161>.
- [58] Sahin, K.; Cross, B.; Sahin, N.; Ciccone, K.; Suleiman, S.; Osunkoya, A.O.; Master, V.; Harris, W.; Carthon, B.; Mohammad, R.; et al. Lycopene in the prevention of renal cell cancer in the TSC2 mutant Eker rat model. *Arch. Biochem. Biophys.* **2015**, *572*, 36–39. <https://doi.org/10.1016/j.abb.2015.01.006>.
- [60] Watanabe, S.; Kitade, Y.; Masaki, T.; Nishioka, M.; Satoh, K.; Nishino, H. Effects of lycopene and Sho-saiko-to on hepatocarcinogenesis in a rat model of spontaneous liver cancer. *Nutr. Cancer* **2001**, *39*, 96–101. [https://doi.org/10.1207/S15327914nc391\\_13](https://doi.org/10.1207/S15327914nc391_13).
- [62] Huang, C.-S.; Liao, J.-W.; Hu, M.-L. Lycopene inhibits experimental metastasis of human hepatoma SK-Hep-1 cells in athymic nude mice. *J. Nutr.* **2008**, *138*, 538–543. <https://doi.org/10.1093/jn/138.3.538>.
- [63] Tang, F.-Y.; Pai, M.-H.; Wang, X.-D. Consumption of lycopene inhibits the growth and progression of colon cancer in a mouse xenograft model. *J. Agric. Food Chem.* **2011**, *59*, 9011–9021. <https://doi.org/10.1021/jf2017644>.
- [68] Sahin, K.; Tuzcu, M.; Sahin, N.; Akdemir, F.; Ozercan, I.; Bayraktar, S.; Kucuk, O. Inhibitory effects of combination of lycopene and genistein on 7,12- dimethyl benz(a)anthracene-induced breast cancer in rats. *Nutr. Cancer* **2011**, *63*, 1279–1286. <https://doi.org/10.1080/01635581.2011.606955>.
- [69] Tang, F.-Y.; Pai, M.-H.; Kuo, Y.-H.; Wang, X.-D. Concomitant consumption of lycopene and fish oil inhibits tumor growth and progression in a mouse xenograft model of colon cancer. *Mol. Nutr. Food Res.* **2012**, *56*, 1520–1531. <https://doi.org/10.1002/mnfr.201200098>.
- [71] Velmurugan, B.; Bhuvaneswari, V.; Burra, U.K.; Nagini, S. Prevention of N-methyl-N'-nitro-N-nitrosoguanidine and saturated sodium chloride-induced gastric carcinogenesis in Wistar rats by lycopene. *Eur. J. Cancer Prev.* **2002**, *11*, 19–26. <https://doi.org/10.1097/00008469-200202000-00004>.
- [72] Liu, C.; Russell, R.M.; Wang, X.-D. Lycopene supplementation prevents smoke-induced changes in p53, p53 phosphorylation, cell proliferation, and apoptosis in the gastric mucosa of ferrets. *J. Nutr.* **2006**, *136*, 106–111. <https://doi.org/10.1093/jn/136.1.106>.

- [73] Xu, Y.F.; Zhou, S.K.; Feng, X.J.; Jiang, L.X. Modulatory effect of lycopene on oxidative injury, related proteins and gene expression in gastric cancer tissue. *J. Food Agric. Environ.* **2013**, *11*, 511–515.
- [79] Jiang, X.; Wu, H.; Zhao, W.; Ding, X.; You, Q.; Zhu, F.; Qian, M.; Yu, P. Lycopene improves the efficiency of anti-PD-1 therapy via activating IFN signaling of lung cancer cells. *Cancer Cell Int.* **2019**, *19*, 68. <https://doi.org/10.1186/s12935-019-0789-y>.
- [80] Radhakrishnan, V.K.; Ravikumar, V.; Shivashangari, K.; Sattu, K.; Devaki, T. Chemopreventive Role of Lycopene and D-arginine in Benzo(a) Pyrene Induced Lung Cancer with Reference to Lipid Peroxidation, Antioxidant and Tumor Marker Enzymes. *Int. J. Cancer Res.* **2006**, *2*, 224–233. <https://doi.org/10.3923/ijcr.2006.224.233>.
- [81] Cui, L.; Xu, F.; Wu, K.; Li, L.; Qiao, T.; Li, Z.; Chen, T.; Sun, C. Anticancer effects and possible mechanisms of lycopene intervention on N-methylbenzyl nitrosamine induced esophageal cancer in F344 rats based on PPAR $\gamma$ (1). *Eur. J. Pharmacol.* **2020**, *881*, 173230. <https://doi.org/10.1016/j.ejphar.2020.173230>.
- [83] Luo, C.; Wu, X.-G. Lycopene enhances antioxidant enzyme activities and immunity function in N-methyl-N'-nitro-N-nitrosoguanidine-induced gastric cancer rats. *Int. J. Mol. Sci.* **2011**, *12*, 3340–3351. <https://doi.org/10.3390/ijms12053340>.
- [85] Kim, D.J.; Takasuka, N.; Nishino, H.; Tsuda, H. Chemoprevention of lung cancer by lycopene. *Biofactors* **2000**, *13*, 95–102. <https://doi.org/10.1002/biof.5520130116>.
- [86] Chen, P.; Xu, S.; Qu, J. Lycopene Protects Keratinocytes Against UVB Radiation-Induced Carcinogenesis via Negative Regulation of FOXO3a Through the mTORC2/AKT Signaling Pathway. *J. Cell. Biochem.* **2018**, *119*, 366–377. <https://doi.org/10.1002/jcb.26189>.
- [88] Bhatia, N.; Gupta, P.; Singh, B.; Koul, A. Lycopene Enriched Tomato Extract Inhibits Hypoxia, Angiogenesis, and Metastatic Markers in early Stage N-Nitrosodiethylamine Induced Hepatocellular Carcinoma. *Nutr. Cancer* **2015**, *67*, 1268–1275. <https://doi.org/10.1080/01635581.2015.1087040>.
- [91] Liu, C.; Lian, F.; Smith, D.E.; Russell, R.M.; Wang, X.-D. Lycopene supplementation inhibits lung squamous metaplasia and induces apoptosis via up-regulating insulin-like growth factor-binding protein 3 in cigarette smoke-exposed ferrets. *Cancer Res.* **2003**, *63*, 3138–3144.
- [93] Velmurugan, B.; Nagini, S. Combination chemoprevention of experimental gastric carcinogenesis by s-allylcysteine and lycopene: Modulatory effects on glutathione redox cycle antioxidants. *J. Med. Food* **2005**, *8*, 494–501. <https://doi.org/10.1089/jmf.2005.8.494>.
- [94] Sahin, K.; Yenice, E.; Tuzcu, M.; Orhan, C.; Mizrak, C.; Ozercan, I.H.; Sahin, N.; Yilmaz, B.; Bilir, B.; Ozpolat, B.; et al. Lycopene Protects Against Spontaneous Ovarian Cancer Formation in Laying Hens. *J. Cancer Prev.* **2018**, *23*, 25–36. <https://doi.org/10.15430/JCP.2018.23.1.25>.
